# Supplementary material
Source: Springer Nature journal article supplement (https://www.springermedizin.de/resource/supplementary/12911_2009_302_MOESM9_ESM.pdf/9525454)
Supplement: MOESM9 [file 9525454]

The patients suffering botulism poisoning who were rushed to Bangkok from Nan remain in a critical condition, doctors at several hospitals **said yesterday**.

While the 17 people are stable, they are not yet out of danger, Medical Service director-general Dr Chatri Banchuen **said**.

...

..., Chatri **added**.

...

..., hospital director Dr. Jessa Chokedumrongsuk **said**.

...

..., hospital director Dr. Vinit Pua-pradit **said**.

...

..., the doctor **claimed**.
